# Supplementary material for: Can Resveratrol Influence the Activity of 11β-Hydroxysteroid Dehydrogenase Type 1? A Combined In Silico and In Vivo Study
Source: MDPI journal article supplement (doi:10.3390/ph16020251), 2023-02-07
Supplement: s1 [file s1]

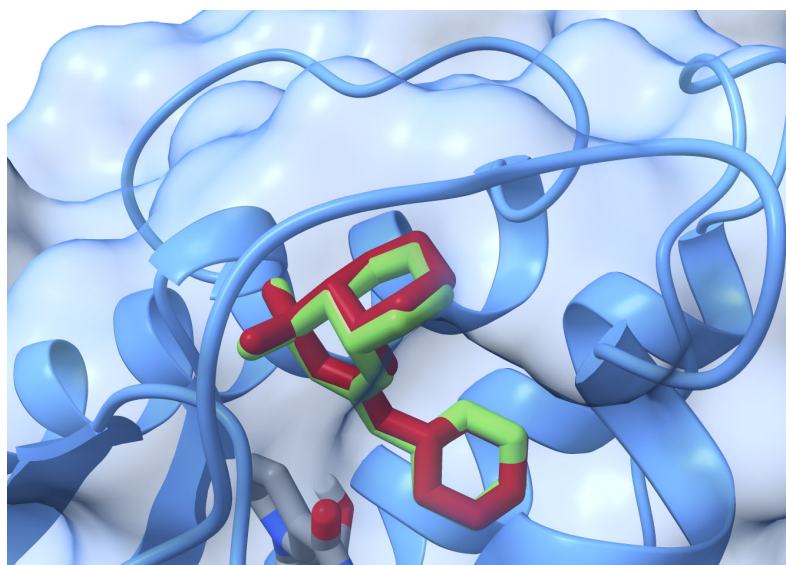

**Figure S1.** Overlay of experimental (green) and docked (red) SFF structures within the 11 $\beta$ -HSD-1 protein pocket.

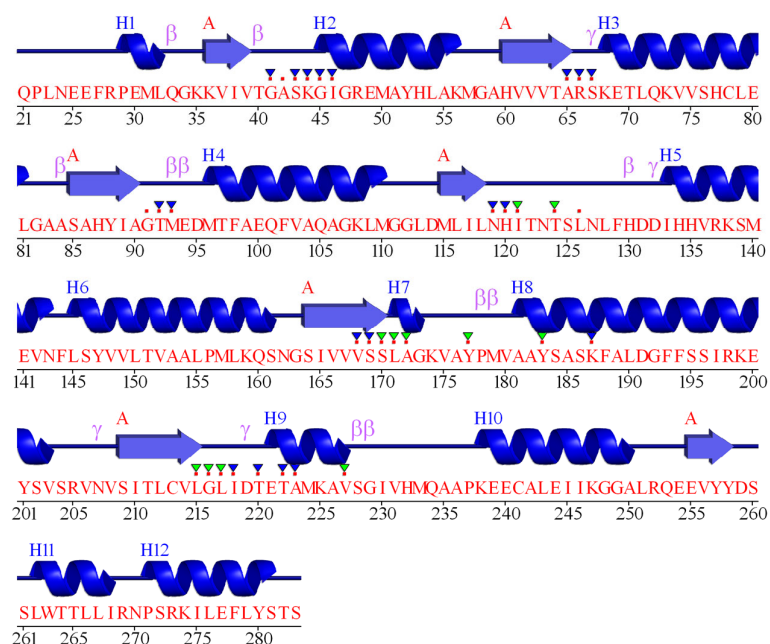

**Figure S2.** Secondary structure of the 11 $\beta$ -HSD-1 protein. Figure was generated with the PDBsum web server [55].

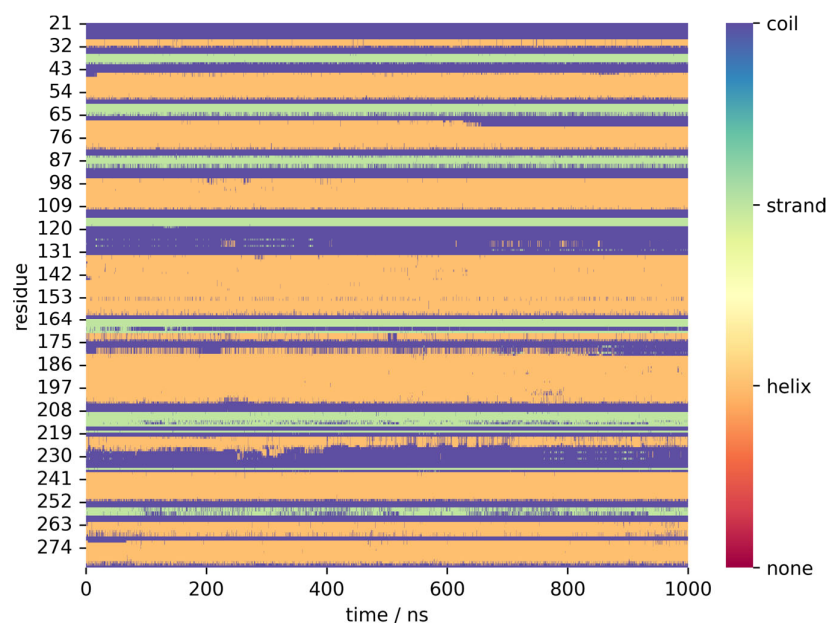

**Figure S3.** Changes in the secondary structure of the 11β-HSD-1 protein during molecular dynamics simulation.

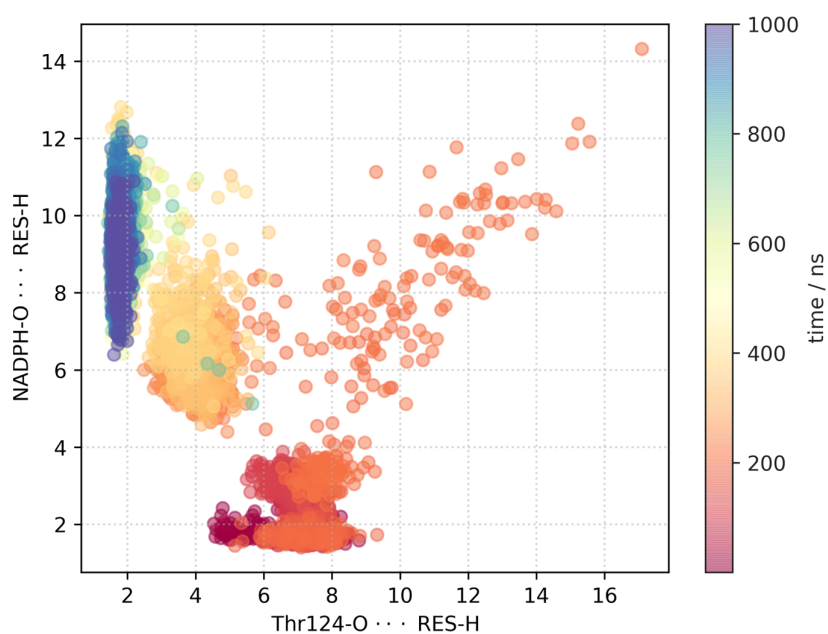

**Figure S4.** Time evolution of the two most populated hydrogen bonds between RES and 11β-HSD-1 during the MD simulation.

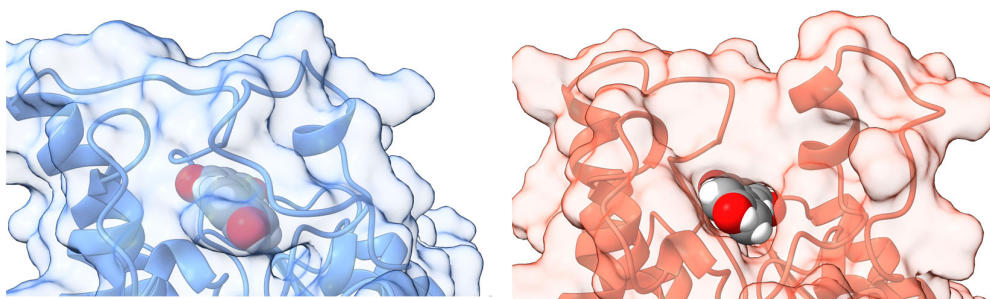

**Figure S5.** Geometry of the catalytic pocket in two representative conformations A (left) and B (right).

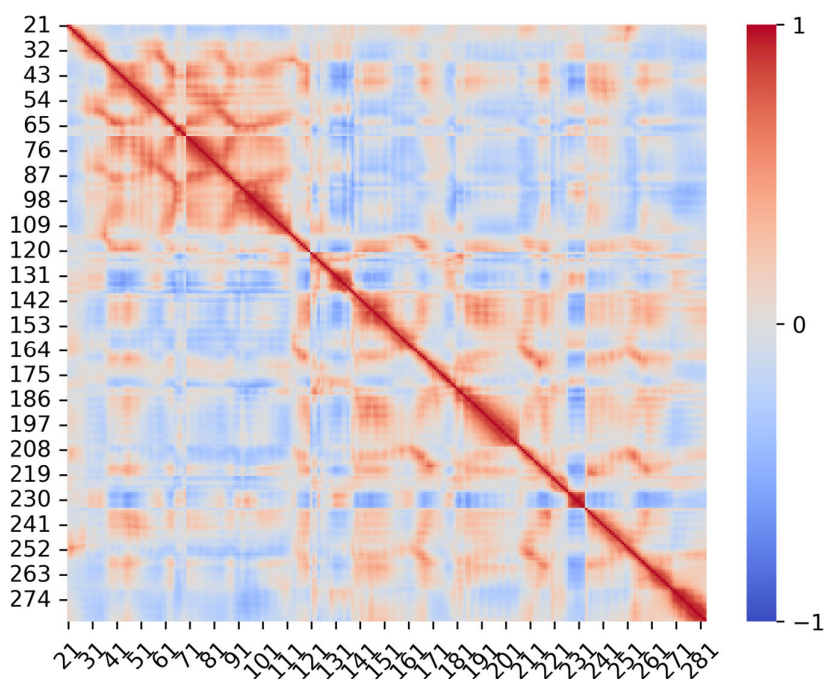

**Figure S6.** Dynamic cross-correlation heat map for the RES:11 $\beta$ -HSD-1 complex. Correlated movements are encoded by the red color, anti-correlated movements by the blue color.

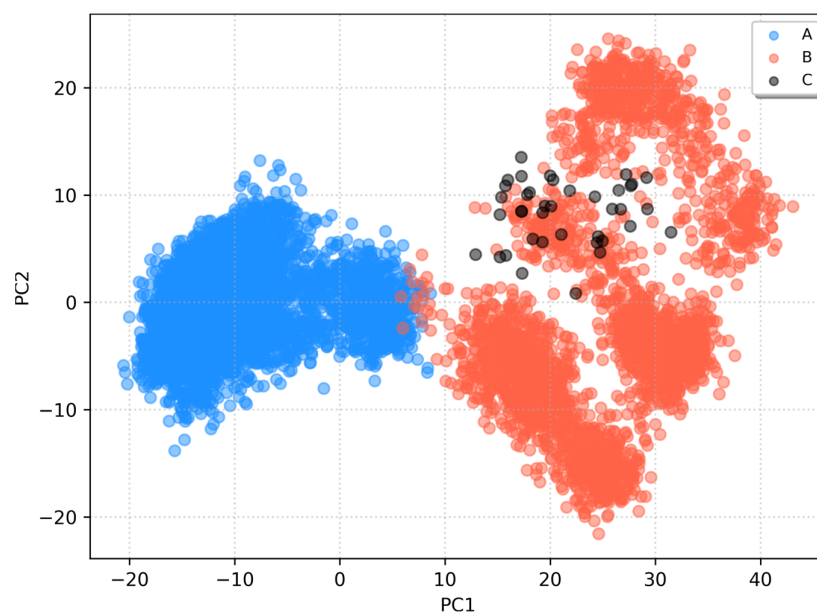

**Figure S7.** Two-dimensional PCA scatterplots showing the projections of the displacement of the  $\text{Ca}$  atoms along the first two eigenvectors for each frame of the RES:11 $\beta$ -HSD-1 complex. Conformations A (blue), B (red), and C (black).

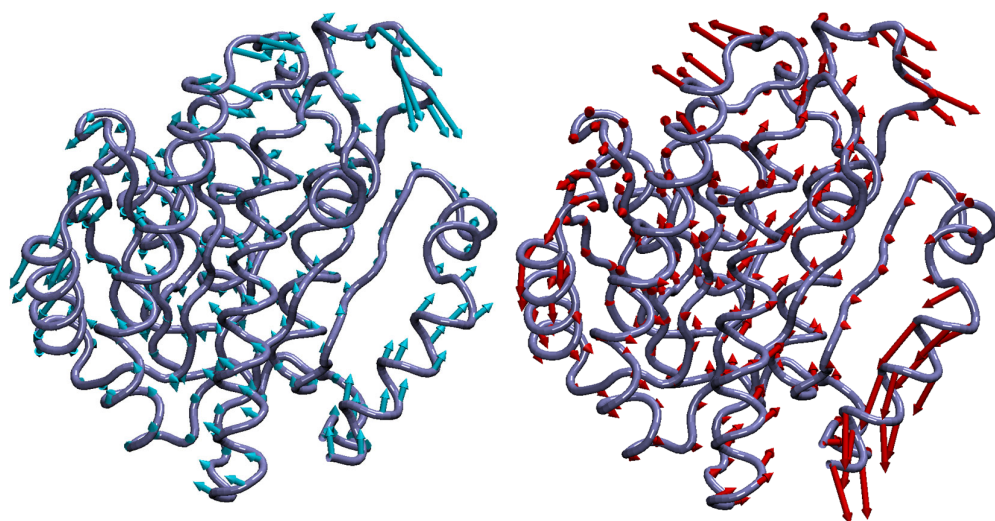

**Figure S8.** Visualization of the PC1 (left) and PC2 (right) modes of the RES:11 $\beta$ -HSD-1 complex.

**Table S1.** Clustering statistics for the RES:11 $\beta$ -HSD-1 complex.

| # of clusters | DBI <sup>a</sup> | pSF <sup>b</sup> | SSR/SST <sup>c</sup> |
|---------------|------------------|------------------|----------------------|
| 2             | 1.249            | 115.7            | 0.011                |
| 3             | 1.298            | 2256.7           | 0.311                |
| 4             | 2.177            | 1823.5           | 0.354                |
| 5             | 2.202            | 1631.1           | 0.395                |
| 6             | 2.108            | 1310.4           | 0.396                |
| 7             | 2.062            | 1236.0           | 0.426                |
| 8             | 2.125            | 1187.2           | 0.454                |
| 9             | 2.045            | 1087.0           | 0.465                |
| 10            | 2.046            | 975.2            | 0.468                |

<sup>a</sup> DBI = Davies-Bouldin index, <sup>b</sup> pSF = pseudo-F statistic, <sup>c</sup> SSR/SST = ratio of sum of squares regression and sum of squares error
